# Supplementary material for: Apple peel polyphenol alleviates antibiotic-induced intestinal dysbiosis by modulating tight junction proteins, the TLR4/NF-κB pathway and intestinal flora
Source: Royal Society of Chemistry journal article supplement (doi:10.1039/d3fo01358h), 2023-01-01
Supplement: d3fo01358h1.pdf [file d3fo01358h1.pdf]

### Supplementary material

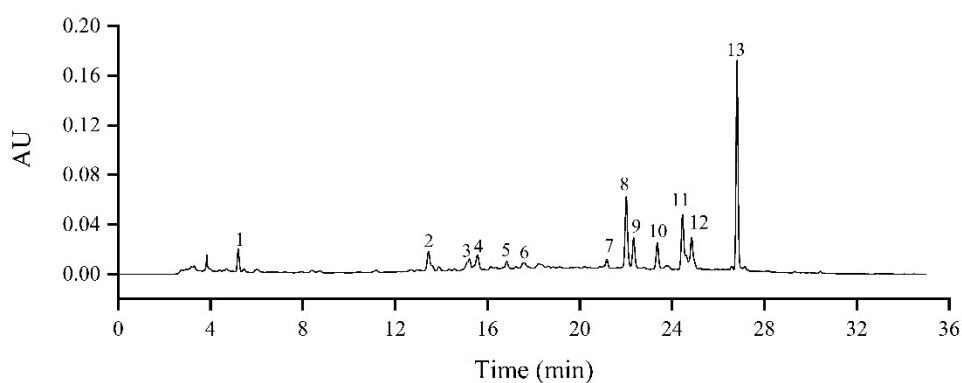

**Fig. S1** HPLC analysis of polyphenols in APP.

**Table S1** Polyphenol composition in APP.

| Number | RT (min) | Phenolic compound           | Content (mg/100g, DW) |
|--------|----------|-----------------------------|-----------------------|
| 1      | 5.200    | Gallic acid                 | 51.27 ± 0.29          |
| 2      | 13.446   | Chlorogenic acid            | 190.43 ± 6.28         |
| 3      | 15.218   | Vanillic acid               | 90.40 ± 1.28          |
| 4      | 15.566   | Caffeic acid                | 61.57 ± 0.34          |
| 5      | 16.836   | Epicatechin                 | 130.55 ± 12.93        |
| 6      | 17.575   | EGCG                        | 148.38 ± 1.17         |
| 7      | 21.169   | Rutin                       | 135.74 ± 12.40        |
| 8      | 22.011   | Hyperoside                  | 530.06 ± 23.21        |
| 9      | 22.332   | Isoquercitrin               | 184.22 ± 20.79        |
| 10     | 23.357   | Ferulic acid                | 64.41 ± 1.47          |
| 11     | 24.449   | Quercetin                   | 459.04 ± 14.82        |
| 12     | 24.844   | Dihydroflavonoid glycosides | 131.40 ± 4.68         |
| 13     | 26.811   | Phloridin                   | 515.54 ± 12.60        |

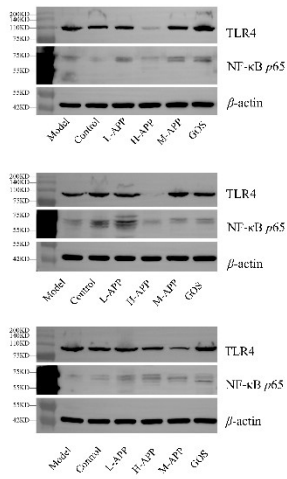

**Fig. S2** Western blot strips.
